## Periodic and Aperiodic Neural Activity Displays Age-Dependent Changes Across Early-to-Middle Childhood

Aron T. Hill PhD<sup>1</sup>

Gillian M. Clark PhD<sup>1</sup>

Felicity J. Bigelow GDipPsych<sup>1</sup>

Jarrad A. G. Lum PhD<sup>1</sup>

Peter G. Enticott PhD<sup>1</sup>

1. Cognitive Neuroscience Unit, School of Psychology, Deakin University, Melbourne, Australia

### Correspondence:

Aron T. Hill, PhD

Cognitive Neuroscience Unit

School of Psychology

Deakin University

221 Burwood Hwy, Burwood, Victoria, Australia 3125

Ph: +61 3 924 43006

Email: [a.hill@deakin.edu.au](mailto:a.hill@deakin.edu.au)

**Abbreviations:** EEG, electroencephalography; E/I, excitation/inhibition; FOOF, fitting oscillations and one over f; GABA,  $\gamma$ -aminobutyric acid; ICA, independent component analysis; MEG, magnetoencephalography; PSD, power spectral density; ROI, region of interest; TMS transcranial magnetic stimulation.

1 **Abstract**

2 The neurodevelopmental period spanning early-to-middle childhood represents a time of significant growth and  
3 reorganisation throughout the cortex. Such changes are critical for the emergence and maturation of a range of  
4 social and cognitive processes. Here, we utilised both eyes open and eyes closed resting-state  
5 electroencephalography (EEG) to examine maturational changes in both oscillatory (i.e., periodic) and non-  
6 oscillatory (aperiodic, '1/f-like') activity in a large cohort of participants ranging from 4-to-12 years of age (N=139,  
7 average age=9.41 years, SD=1.95). The EEG signal was parameterised into aperiodic and periodic  
8 components, and linear regression models were used to evaluate if chronological age could predict aperiodic  
9 exponent and offset, as well as well as peak frequency and power within the alpha and beta ranges. Exponent  
10 and offset were found to both decrease with age, while aperiodic-adjusted alpha peak frequency increased with  
11 age; however, there was no association between age and peak frequency for the beta band. Age was also  
12 unrelated to aperiodic-adjusted spectral power within either the alpha or beta bands, despite both frequency  
13 ranges being correlated with the aperiodic signal. Overall, these results highlight the capacity for both periodic  
14 and aperiodic features of the EEG to elucidate age-related functional changes within the developing brain.

15

16 **Key words:** EEG, aperiodic activity, oscillations, neurodevelopment, neurophysiology, spectral power

17

18

## 19 **1. Introduction**

20 Electroencephalography (EEG) has proven highly valuable in quantifying neural dynamics and providing critical  
21 insights into the physiological processes that underlie key aspects of human cognition and neurodevelopment.  
22 Neural oscillations represent a prominent and extensively investigated feature of the EEG record, reflecting  
23 synchronised fluctuations in excitability across cortical microcircuits, both within and between broader neuronal  
24 networks (Buzsáki & Draguhn, 2004; Cohen, 2017). Decades of research has linked oscillatory activity within  
25 the cortex to a broad range of cognitive, perceptual, and developmental processes (Benchenane et al., 2011;  
26 Kahana, 2006), while changes in the frequency or amplitude of oscillations can be a sign of pathological neural  
27 activity in a number of psychiatric, neurological, and neurodevelopmental disorders (Başar, 2013; Newson &  
28 Thiagarajan, 2018; Voytek & Knight, 2015; Wang et al., 2013).

29  
30 Resting-state EEG recordings can be used to capture spontaneous, or 'intrinsic' activity that occurs in the  
31 absence of any overt external stimuli, or task-related neurocognitive processing (Buzsáki et al., 2012; Michel &  
32 Murray, 2012). A common trend observed in studies examining maturational changes in resting-state brain  
33 rhythms in children and adolescents is a reduction in power with increasing age within lower frequency ranges  
34 (i.e., delta and theta bands; Clarke et al., 2001; Gasser et al., 1988; Gómez et al., 2013; John et al., 1980) which  
35 is also often accompanied by a concomitant increase in power within faster rhythms, particularly the alpha  
36 and beta bands (Benninger et al., 1984; Gasser et al., 1988; Gómez et al., 2013; Marshall et al., 2002; Saby &  
37 Marshall, 2012). In addition to changes in spectral power, the peak frequency of the dominant posterior alpha  
38 rhythm also increases with age until around late childhood, or early adulthood (Cellier et al., 2021; Chiang et  
39 al., 2011; Eeg-Olofsson et al., 1971; Marshall et al., 2002; Miskovic et al., 2015; Stroganova et al., 1999). These  
40 shifts in oscillatory dynamics likely reflect multiple structural and functional neurodevelopmental processes,  
41 including differentiation and specialisation of cortical regions/networks, synaptic and axonal pruning, and  
42 alterations in excitatory and inhibitory (E/I) circuits (De Bellis et al., 2001; Feinberg & Campbell, 2010; Lujan et  
43 al., 2005; Uhlhaas et al., 2010).

44  
45 The EEG signal, however, reflects not only oscillatory (i.e., periodic) activity, but also additional background  
46 aperiodic, or 'scale-free' broadband activity, which is present at all frequencies and adheres to a  $1/f$  power  
47 distribution, whereby spectral power decreases with increasing frequency (Barry & De Blasio, 2021; Donoghue  
48 et al., 2020b; He, 2014; Muthukumaraswamy & Liley, 2018; Pritchard, 1992). Despite constituting a large  
49 proportion of the spontaneous neural activity recorded from the cortex (Bullock et al., 2003; He et al., 2010), the  
50 aperiodic component has until recently received only limited attention in the EEG literature, often being treated  
51 as 'noise' and regarded as having limited physiological relevance (Donoghue et al., 2020b; He, 2014). Recent  
52 work, however, has begun to provide compelling evidence in support of the importance of the aperiodic signal.  
53 Studies have shown aperiodic activity to be modulated by task-performance (He et al., 2010), level of arousal  
54 (Lendner et al., 2020), and drug-induced states (Colombo et al., 2019; Muthukumaraswamy & Liley, 2018;  
55 Waschke et al., 2021). In addition, several studies have shown features of the aperiodic signal to be altered in  
56 neurological and psychiatric disease (Molina et al., 2020; Ostlund et al., 2021a; Robertson et al., 2019;  
57 Wilkinson & Nelson, 2021).

58

59 The aperiodic signal is comprised of two parameters: a spectral slope (henceforth referred to as the aperiodic  
60 *exponent*), and an *offset* (Donoghue et al., 2020b). The exponent represents the pattern of power across  
61 frequencies, reflecting the steepness of the decay of the power spectrum (Donoghue et al., 2020b), while the  
62 offset reflects the broadband shift in power across frequencies (Figure 1B). Emerging research now indicates  
63 that these parameters show changes across the lifespan. In adults, a reduction in the exponent (i.e., ‘flatter’  
64 power spectral density [PSD]) with increasing age has been observed across several independent studies (Dave  
65 et al., 2018; Merkin et al., 2021; Tran et al., 2020; Voytek et al., 2015). There is also some limited evidence to  
66 suggest that these age-dependent changes also occur during childhood. For example, a recent longitudinal  
67 EEG study in infants (age ranging between 38 to 203 days) revealed that exponent values decline with age  
68 across this early developmental window (Schaworonkow & Voytek, 2021). Additionally, an analysis of  
69 magnetoencephalographic (MEG) recordings from a cohort of 24 neurotypical children (mean age = 8.0 years)  
70 and 24 adults (mean age = 40.6 years) showed adults to exhibit flatter exponents, and smaller offset values  
71 than children (He et al., 2019). A further study containing EEG recordings from both children and young adults  
72 (age range 5-21 years), the majority (~ 88%) of whom had a psychiatric diagnosis, also reported a flattening of  
73 the aperiodic exponent, and reduction in offset with increasing age (Tröndle et al., 2020). Similarly, Cellier et al.  
74 (2021) recently reported a similar trend in a sample containing both children and adults (age range 3-24 years).

75

76 In sum, neural activity patterns demonstrate various changes across the lifespan. Growing evidence indicates  
77 that these alterations do not only reflect shifts in oscillatory dynamics, but also changes within the underlying  
78 broadband aperiodic signal. The developmental period spanning early-to-middle childhood is a time of  
79 significant and widespread functional and neuroanatomical changes which correspond to vastly increased social  
80 and cognitive demands (Bunge & Wright, 2007; Casey et al., 2005). Understanding modifications in both  
81 oscillatory and aperiodic neural dynamics within this critical neurodevelopmental period is therefore likely to  
82 provide important insight into the physiological processes which take place during this time. The primary aim of  
83 the present study was to provide a comprehensive analysis of both periodic and aperiodic components of the  
84 spontaneous EEG record in a large cohort of neurotypical children. To achieve this, we employed a recently  
85 developed spectral parameterisation approach (Fitting Oscillations and One Over  $f$  [FOOOF] (Donoghue et al.,  
86 2020b)) which enables decomposition of the neural signal into its respective periodic and aperiodic components.  
87 This permits narrowband oscillatory dynamics (e.g., power and centre frequency) to be extracted from, and  
88 studied independently of, the broadband aperiodic signal. Equally importantly, it further allows explicit  
89 measurement of the aperiodic signal, which is likely to be driven by a unique set of neural generators (Donoghue  
90 et al., 2021; Ostlund et al., 2021b). Using linear regression models, we examined whether chronological age  
91 would predict exponent and offset within the aperiodic signal, as well as the power and centre frequency of the  
92 dominant alpha and beta oscillations.

93

## 94 **2. Methods**

### 95 *2.1 Participants*

96 The sample comprised 139 typically developing children (72 male; average age = 9.41 years, SD = 1.95; age  
97 range: 4-12 years). All participants were proficient English speakers, and had no history of any  
98 neurodevelopmental or neuropsychiatric disorder (as reported by their primary care-giver). Ethical approval was

99 provided by the Deakin University Human Research Ethics Committee (2017-065), while approval to approach  
100 public schools was granted by the Victorian Department of Education and Training (2017\_003429).

## 102 *2.2 Procedure*

103 Data were collected during a single experimental session conducted either at the university laboratory, or in a  
104 quiet room at the participants' school. Prior to commencement of the study, written consent was obtained from  
105 the parent or legal guardian of each child. Details of the experimental protocol were also explained to each child  
106 who then agreed to participate. Data reported in this study were collected as part of a larger neurocognitive and  
107 electrophysiological investigation into the development of the social brain in early and middle childhood (Bigelow  
108 et al., 2021).

## 110 *2.3 EEG data acquisition*

111 EEG data were recorded in a dimly lit room using a 64-channel HydroCel Geodesic Sensor Net (Electrical  
112 Geodesics, Inc, USA) containing Ag/AgCl electrodes surrounded by electrolyte-wetted sponges. Data were  
113 acquired using NetStation software (version 5.0) via a Net Amps 400 amplifier using a sampling rate of 1 KHz,  
114 with data online referenced to the Cz electrode. Prior to the commencement of recording, electrode impedances  
115 were checked to ensure they were < 50 KOhms. The resting-state data were recorded for two minutes while  
116 participants sat with their eyes open and stared at a fixation cross on a computer screen, and two minutes while  
117 participants had their eyes closed.

## 119 *2.4 EEG data analysis*

### 120 *2.4.1 Pre-processing*

121 All pre-processing procedures were performed in Matlab (R2020a; The Mathworks, Massachusetts, USA)  
122 incorporating the EEGLAB toolbox (Delorme & Makeig, 2004) along with custom scripts. The raw EEG files  
123 were cleaned using the Reduction of Electrophysiological Artifacts (RELAX) pre-processing pipeline (Bailey et  
124 al., 2021). This validated and fully automated pipeline uses empirical approaches to identify and reduce artifacts  
125 within the data, including the use of both multiple Wiener filters and wavelet enhanced independent component  
126 analysis (ICA). Briefly, data were bandpass filtered between 0.5 – 80 Hz (fourth-order Butterworth filter), with a  
127 notch filter between 47-53 Hz to remove any line noise, following which any bad channels were removed using  
128 a multi-step process including the 'findNoisyChannels' function from the PREP pipeline (Bigdely-Shamlo et al.,  
129 2015). Data were then subject to multiple Wiener filtering, followed by wavelet-enhanced ICA, with components  
130 for cleaning identified using IClab (Pion-Tonachini et al., 2019). Data were re-referenced to the average of all  
131 electrodes ready for further analysis. As a final step, all pre-processed data files were also visually inspected  
132 prior to inclusion in the analyses. An overview of the key steps involved in the RELAX pre-processing pipeline  
133 can be found in the Supplemental Materials (Figure S1).

### 135 *2.4.2 Parameterisation of the spectral data*

136 PSD was first calculated separately for each participant and electrode across the continuous EEG using Welch's  
137 method implemented in Matlab (2 second Hamming window, 50% overlap). The FOOF Python toolbox  
138 (version 1.0.0; <https://foof-tools.github.io/foof/>) was then used to parameterize the spectral data through

139 separation of the periodic and aperiodic components of the signal. Using this approach, PSDs are treated as a  
140 linear combination of both aperiodic activity and oscillatory peaks with amplitudes that extend above the  
141 aperiodic signal (for a detailed overview of this approach see: Donoghue et al., 2020b; Ostlund et al., 2021b).  
142 Using a model driven approach, the FOOOF algorithm is able to extract both periodic and aperiodic components  
143 within the overall power spectra (Donoghue et al., 2020b). For the present study, we extracted the aperiodic  
144 exponent and offset across a broad frequency range between 1 and 40 Hz, similar to prior studies (Cellier et  
145 al., 2021; Molina et al., 2020; Ostlund et al., 2021a), and as recommended in the FOOOF documentation in  
146 order to allow for reliable estimation of the aperiodic component of the data. Fitting was performed using the  
147 'fixed' aperiodic mode due to the absence of a clear 'knee' in the power spectrum when the output was visually  
148 inspected in log-log space (i.e., the signal was approximately linear across the specified frequency range).  
149 Spectral parameterisation settings for the algorithm were: peak width limits = [1, 12], maximum number of peaks  
150 = 8, peak threshold = 2, minimum peak height = 0.0. The final FOOOF outputs are the aperiodic exponent and  
151 offset values, as well as the centre frequency, power, and bandwidth for the oscillatory component of the signal  
152 (see Figure 1A).

153

#### 154 2.4.3 Aperiodic Exponent and Offset

155 The exponent and offset values were extracted from the aperiodic signal for each participant and for each EEG  
156 electrode. Prior to statistical analysis, the data were averaged across all scalp electrodes for each participant  
157 to generate a 'global' exponent and offset value representing the mean signal across the scalp. This approach  
158 was chosen as we had no *a priori* hypotheses regarding the scalp distribution of the aperiodic components  
159 (Jacob et al., 2021) and also helped to avoid multiple comparisons across electrodes. In instances where  
160 significant results were achieved at the global level, we then ran additional analyses across three broad cortical  
161 regions using the average signal across electrode clusters covering bilateral anterior (Fp1, Fp2, AFz, AF3, AF4,  
162 Fz, F1, F2, F3, F4, F5, F6, F7, F8), central (FCz, FC1, FC2, FC3, FC4, C1, C2, C3, C4, C5, C6, CP1, CP2),  
163 and posterior (Pz, P1, P2, P3, P4, P5, P6, P7, P8, POz, PO3, PO4, Oz, O1, O2) channels\* (see Figure 2C for  
164 a depiction of the EEG cap with the three electrode clusters highlighted).

165

#### 166 2.4.4 Spectral power and centre frequency

167 Following spectral parameterisation, the *power* and *centre frequency* peak parameters were extracted from the  
168 periodic signal for both the alpha (7-13 Hz) and beta (13-30 Hz) frequency ranges. These two frequency ranges  
169 were selected based on visual inspection of the power spectra, which indicated clear peaks (i.e., 'bumps' in the  
170 power spectra) over-and-above the  $1/f$ -like decay for most participants (e.g., Figure 1A). Conversely, far fewer  
171 participants demonstrated clearly discernible peaks within the canonical delta (1-3 Hz), theta (3-7 Hz), and  
172 gamma (>30 Hz) ranges, consistent with other findings (Ostlund et al., 2021b). For statistical analysis, spectral  
173 power and centre frequency values were extracted from the midline electrode exhibiting the highest power value  
174 (alpha = POz, beta = FCz). Single electrodes, as opposed to electrode clusters, were used in this instance, as  
175 the precise number of peaks detected for each electrode differed across subjects, thus prohibiting averaging  
176 across a larger ROI. Following removal of the aperiodic components of the signal, an alpha peak was detected

---

\* Note: International 10-10 electrode positions are stated for ease of interpretation. Channels listed are those which best approximate the sensor positions used by the Geodesic Sensor Net.

177 in 131 (94.2%) and 138 (99.3%) of participants in the eyes open and eyes closed recordings, respectively; while  
178 in the beta range, a peak was successfully detected in 136 (97.8%) and 132 (95.0%) participants for the eyes  
179 open and eyes closed conditions, respectively.

180

### 181 *2.5 Statistical analysis*

182 Statistical analyses were conducted in R (version 4.0.3; R Core Team, 2020). Ordinary least squares regression  
183 models were used to predict each of the aperiodic (exponent, offset) and periodic (centre frequency, spectral  
184 power) EEG components from chronological age. Regressions were run separately for the eyes open and eyes  
185 closed EEG recordings, and for each outcome variable. Residuals diagnostics were performed for all models to  
186 assess assumptions ('olsrr' package). This included visual inspection of residual Q-Q plots, residual versus  
187 fitted values plots, and histograms, as well as Kolmogorov-Smirnov normality tests. In cases of severe  
188 violations, the outcome variable was transformed using Yeo-Johnson power transformations (Yeo & Johnson,  
189 2000). As the aperiodic data used the average signal across all electrodes, we also ran further Spearman rank-  
190 order correlations to assess for associations between age and exponent and offset values separately across  
191 anterior, central, and posterior electrode clusters in instances where regression models were significant. Finally,  
192 we ran exploratory correlations to assess for any associations between the aperiodic exponent and offset  
193 values, and aperiodic-adjusted spectral power. For all analyses, Bonferroni corrections were used to control for  
194 multiple comparisons. For regression models using the aperiodic data, we corrected for four comparisons (2  
195 aperiodic parameters [exponent, offset] x 2 recording conditions [eyes open, eyes closed]; adjusted alpha =  
196 .0125). For the periodic data, we corrected for eight comparisons (2 periodic parameters [centre frequency,  
197 spectral power] x 2 frequencies [alpha, beta] x 2 recording conditions [eyes open, eyes closed]; adjusted alpha  
198 = .006). Correlations comparing age and aperiodic activity across specific scalp locations were corrected to  
199 account for electrode cluster (3 [anterior, central, posterior] x 2 recording conditions [eyes open, eyes closed];  
200 adjusted alpha = .008). Correlations between exponent and offset were corrected for two correlations (eyes  
201 open, eyes closed; adjusted alpha = .025); while correlations between aperiodic activity and spectral power  
202 were corrected for eight comparisons (2 periodic parameters [centre frequency, spectral power] x 2 periodic  
203 parameters [peak frequency, power], and x 2 recording conditions [eyes open, eyes closed]; adjusted alpha =  
204 .006).

205

## 206 **3. Results**

### 207 *3.1 Algorithm performance and characteristics of the aperiodic exponent and offset*

208 The performance of the FOOOF algorithm was assessed via the 'goodness of fit' measures,  $R^2$  and *Error*, which  
209 represent the explained variance, and total error of the model fit, respectively (Donoghue et al., 2020b; Ostlund  
210 et al., 2021b). Good model fits for the FOOOF algorithm were observed for both the eyes open ( $R^2 = .99$ , *Error*  
211 = .05) and eyes closed ( $R^2 = .98$ , *Error* = .07) data (average over all participants/electrodes; Figure 1D). When  
212 comparing the eyes open and eyes closed data,  $R^2$  values were found to be higher for the eyes open, compared  
213 to the eyes closed, condition,  $t(138) = 6.58$ ,  $p < .001$ , while *Error* values were lower for the eyes open, compared  
214 to the eyes closed, condition,  $t(138) = -14.11$ ,  $p < .001$ . Topographic plots of the aperiodic exponent and offset  
215 (average across all subjects) revealed similar patterns for both the eyes open and eyes closed recordings.  
216 Specifically, exponent values showed a relatively widespread distribution, with maximal signal close to the

217 vertex, while offset values were largest across posterior regions of the cortex (Figure 1E). Comparisons between  
 218 the eyes open and eyes closed recordings also indicated that exponent values were significantly larger (i.e.,  
 219 steeper aperiodic slope) in the eyes closed, compared to the eyes open recordings,  $t(138) = -12.68$ ,  $p < .001$ ,  
 220 with offset values also significantly larger for the eyes closed, compared to the eyes open recordings,  $t(138) =$   
 221  $-14.262$ ,  $p < .001$  (Figure 1C). Finally, exponent and offset values were found to be strongly positively correlated  
 222 in both the eyes open ( $\rho = .80$ ,  $p < .001$ ) and eyes closed ( $\rho = .79$ ,  $p < .001$ ) conditions (Figure 1F).  
 223

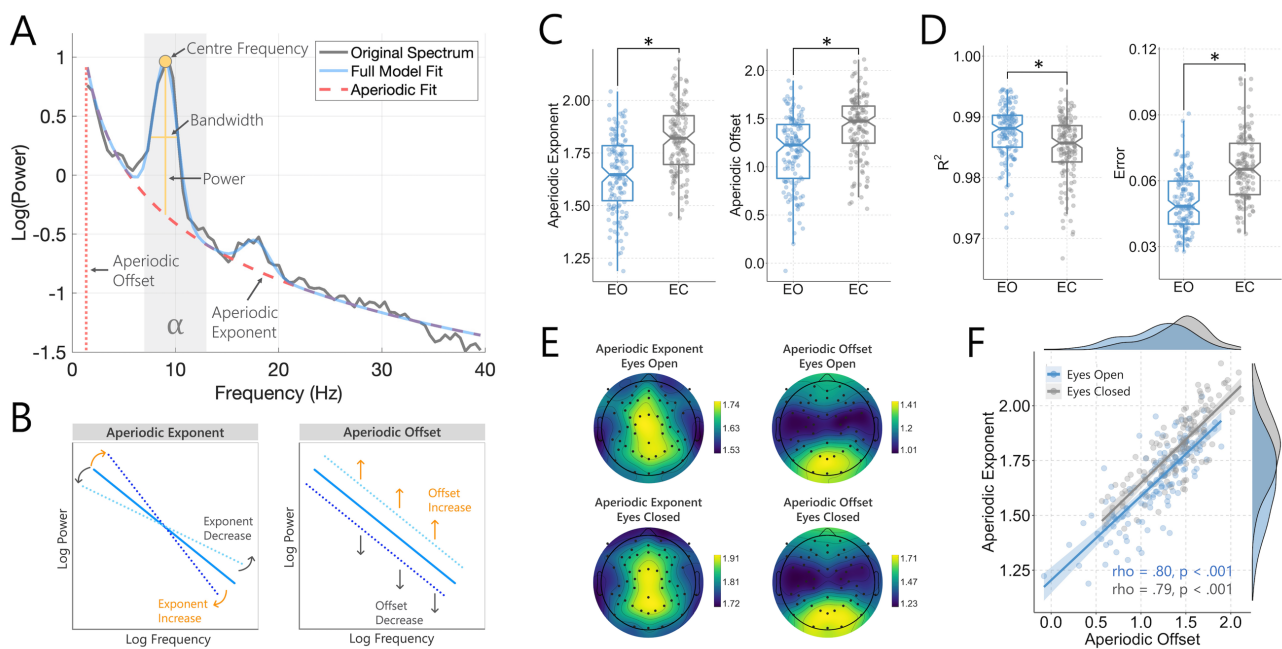

224  
 225 **Figure 1.** A) Example FOOOF model fit from a single subject showing the aperiodic exponent and offset (marked  
 226 in blue) across the analysed frequency range (1-40 Hz). The centre frequency, power, and bandwidth are  
 227 highlighted (arrows) for the oscillatory peak present within the alpha range. B) Graphical illustration  
 228 demonstrating shifts in the aperiodic exponent and offset. C) Aperiodic exponent and offset values for the eyes  
 229 open (EO) and eyes closed (EC) recordings. Values are the average across all EEG electrodes. D) R-squared and  
 230 error values for the model fit for the eyes open and eyes closed recordings (average across all electrodes). E)  
 231 Topographic plots showing the spatial distribution of mean exponent and offset values across participants.  
 232 Exponent values were highest near the midline, spanning frontal, central and posterior channels; while offset  
 233 values were highest over posterior channels. F) Correlation between exponent and offset values (average over  
 234 all electrodes). There was a strong association between both metrics for the eyes open and eyes closed data.  
 235

### 236 3.1 Association between age and aperiodic activity

237 Regression models revealed that age predicted the aperiodic exponent for the eyes open EEG recordings,  
 238  $F(1,37) = 8.12$ ,  $p = .005$ ,  $R^2 = .06$ ; however, the eyes closed recordings failed to reach significance after multiple  
 239 comparison correction,  $F(1,37) = 5.56$ ,  $p = .020$ ,  $R^2 = .04$  (Figure 2A). Age also significantly predicted offset for  
 240 both the eyes open,  $F(1,37) = 25.35$ ,  $p < .001$ ,  $R^2 = .16$ , and eyes closed,  $F(1,37) = 18.07$ ,  $p < .001$ ,  $R^2 = .12$ ,  
 241 EEG recordings (Figure 2A). For conditions that reached significance in the regression models, we further  
 242 examined the relationship between age and aperiodic activity, through correlations using exponent and offset  
 243 values taken from the average across anterior, central, and posterior scalp locations (see Figure 2C for a  
 244 depiction of the electrode clusters used). Correlations were significant across each of these three locations (all  
 245  $p < .008$ ), with the strongest association between age and exponent identified posteriorly ( $\rho = -.35$ ), and the



246 strongest association between age and offset over the anterior region for both the eyes open ( $\rho = -.46$ ) and  
 247 eyes closed ( $\rho = -.39$ ) conditions. Correlation coefficients for all associations are provided in Figure 2B.  
 248 Additional scatterplots can be found in the Supplementary Materials (Figure S2).  
 249

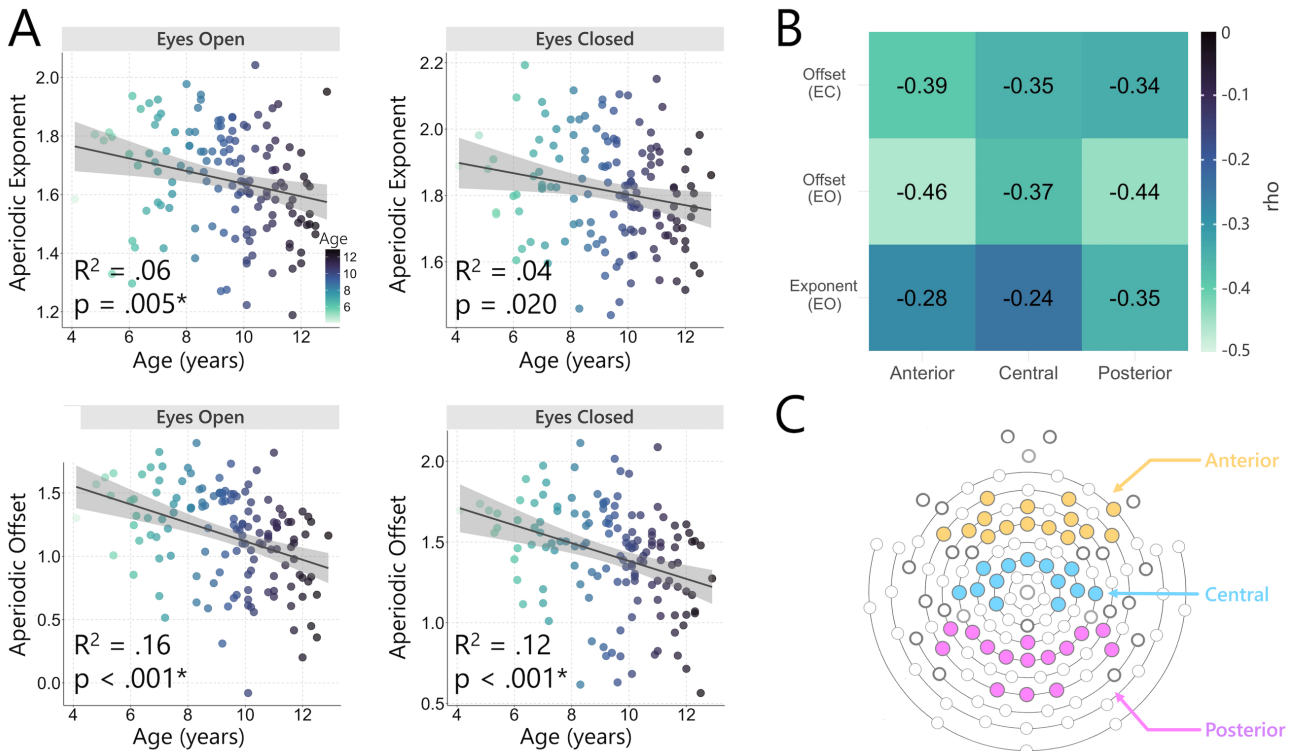

250  
 251 **Figure 2:** Association between age and aperiodic activity. A) Scatterplot of the aperiodic exponent (upper panel)  
 252 and offset (lower panel) in relation to age for the eyes open and eyes closed EEG recordings. R-squared ( $R^2$ ) and  
 253 significance values from the regression analyses are shown (asterisk indicates significance after Bonferroni  
 254 correction). B) Correlations between aperiodic activity and age for each of the anterior, central, and posterior  
 255 electrode clusters. Correlations reached significance across all three locations. C) EEG electrode cap highlighting  
 256 the electrodes forming each of the electrode clusters used for the correlations (anterior = yellow, central = blue,  
 257 posterior = magenta).  
 258

### 259 3.2 Age-related differences in aperiodic-adjusted centre frequency

260 Age was found to predict alpha centre frequency across both the eyes open,  $F(1,129) = 20.73$ ,  $p < .001$ ,  $R^2 =$   
 261  $.14$ , and eyes closed,  $F(1,136) = 22.31$ ,  $p < .001$ ,  $R^2 = .14$ , recordings. Specifically, these findings indicate that  
 262 alpha centre frequency increased systematically with age. In contrast, age did not predict beta centre frequency  
 263 for either eyes open,  $F(1,134) = .13$ ,  $p = .72$ ,  $R^2 = .00$ , or eyes closed,  $F(1,130) = .51$ ,  $p = .47$ ,  $R^2 = .00$ , conditions.  
 264 Scatterplots highlighting the association between age and centre frequency within the alpha and beta bands  
 265 are presented in Figure 3A.  
 266

### 267 3.3 Association between age and aperiodic-adjusted spectral power

268 We assessed whether age could predict the power of the detected oscillatory peaks in the alpha and beta  
 269 ranges after removal of the aperiodic signal. No association between age and power was found for the alpha  
 270 (eyes open:  $F(1,129) = .08$ ,  $p = .78$ ,  $R^2 = .00$ ; eyes closed:  $F(1,136) = 3.02$ ,  $p = .08$ ,  $R^2 = .02$ ), or beta (eyes  
 271 open:  $F(1,134) = 1.67$ ,  $p = .20$ ,  $R^2 = .01$ ; eyes closed:  $F(1,130) = 4.33$ ,  $p = .04$ ,  $R^2 = .03$ ) frequencies (for

272 scatterplots, see Supplementary Figure S3). Figure 3B depicts spectral power in relation to centre frequency  
273 for the alpha and beta frequencies. Given recent work identifying a potential association the aperiodic signal  
274 and aperiodic-adjusted spectral power and peak frequency (He et al., 2019; Merkin et al., 2021), exploratory  
275 analyses were also run comparing exponent and offset (average across all electrodes) with power and centre  
276 frequency within the alpha and beta ranges (using the midline electrode exhibiting the greatest amplitude [alpha  
277 = POz, beta = FCz]). We found significant weak-to-moderate positive correlations between exponent and offset  
278 and aperiodic-adjusted spectral power in both the alpha and beta bands for both the eyes open and eyes closed  
279 data (Bonferroni corrected; all  $p < .006$ ; Figure 4). When comparing aperiodic activity with centre frequency, the  
280 only significant result was a modest negative association between beta power in the eyes open recordings and  
281 exponent ( $\rho = -.24$ ,  $p = .005$ ) and offset ( $\rho = -.26$ ,  $p = .002$ ) (Supplementary Figure S4).  
282

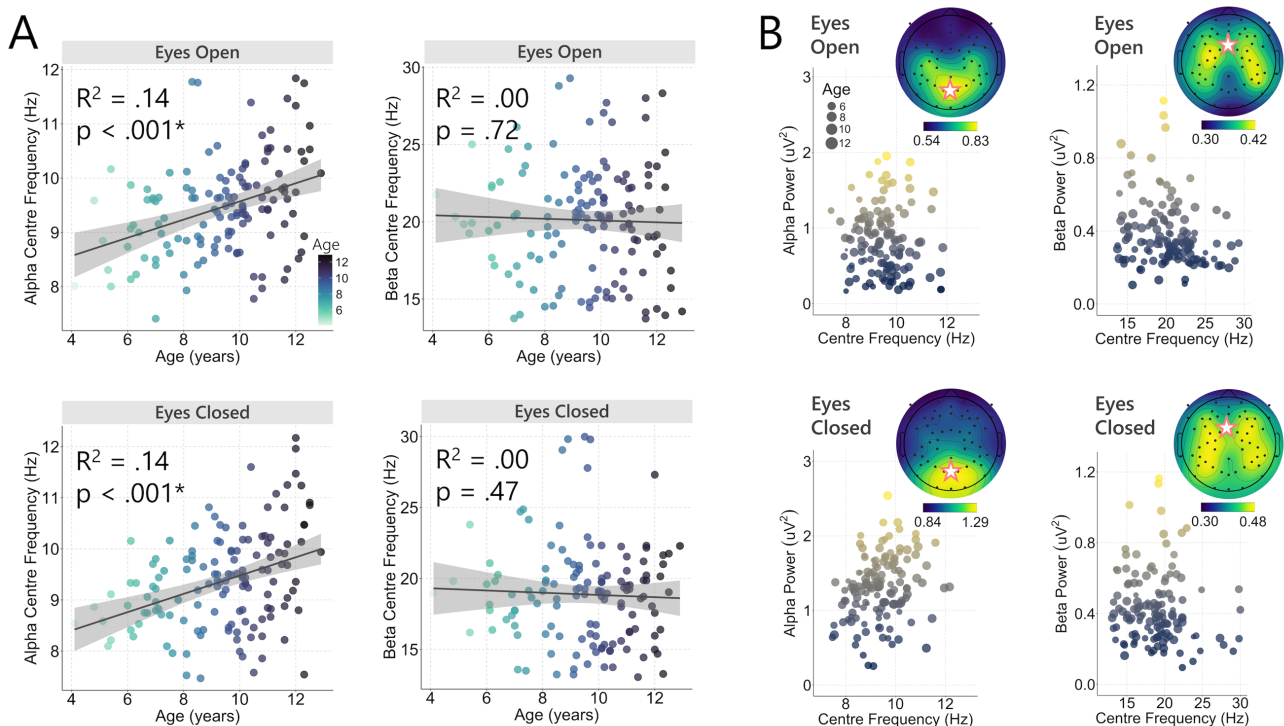

283

284 **Figure 3:** A) Scatter plots of centre frequency for the alpha and beta range in relation to age. Significance values  
285 from the regression analyses are shown (asterisk indicates significance after Bonferroni correction). Age was  
286 found to significantly predict alpha, but not beta, centre frequency. B) Spectral power plotted in relation to  
287 centre frequency for the alpha and beta frequency ranges. Topographic plots show the average power  
288 distribution for each of the eyes open and eyes closed recordings for the alpha and beta frequency ranges. Star  
289 indicates the electrode used for obtaining the power and centre frequency values used in the analyses (alpha =  
290 POz electrode, beta = FCz electrode).  
291

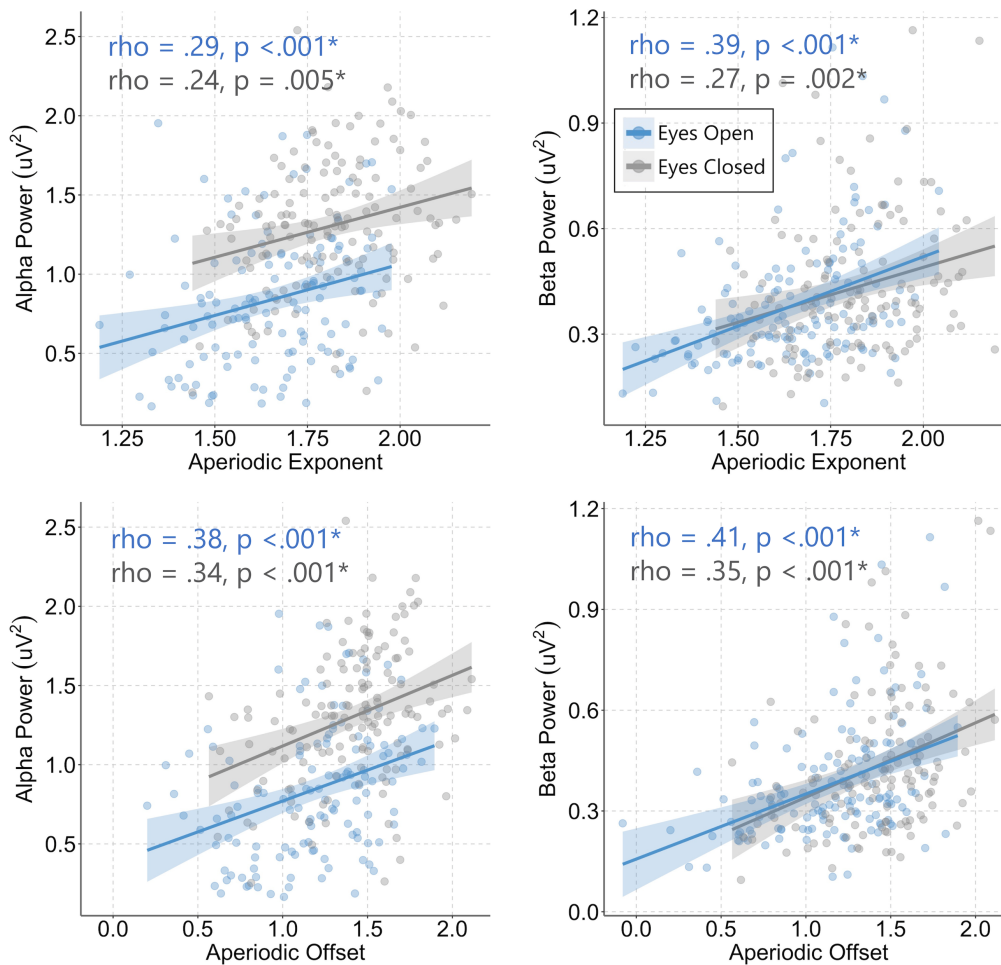

292

293 **Figure 4:** Scatterplots depicting the association between aperiodic activity and aperiodic-adjusted oscillatory  
294 power. Both exponent and offset positively correlated with spectral power in both the alpha and beta bands  
295 across the eyes open and eyes closed conditions. Asterisks indicate a significant correlation after Bonferroni  
296 correction.  
297

#### 298 4. Discussion

299 The aim of the present study was to characterise neurodevelopmental changes across both the periodic and  
300 aperiodic components of the spontaneous EEG signal in early-to-middle childhood. To achieve this, we applied  
301 a spectral parameterization approach to disentangle key features (i.e., centre frequency and power) of  
302 narrowband oscillations in the alpha and beta band from the broader aperiodic signal. Using regression models,  
303 we then examined if participants' age could predict the aperiodic exponent and offset, as well as power and  
304 centre frequency within the alpha and beta frequencies. Several key findings emerged from this investigation.  
305 First, we found chronological age to be a predictor of both aperiodic exponent and offset, with older children  
306 having smaller exponent values (i.e., flatter 1/f spectral slope) and reduced offset values, compared to younger  
307 children. Second, we found that age was also able to predict centre frequency of the alpha (but not beta) band,  
308 with older children displaying faster peak frequencies. Finally, age was unable to predict spectral power in either  
309 the alpha or beta bands; however, power within these bands significantly correlated with both aperiodic  
310 exponent and offset.  
311

311

312 *4.1 Age predicts aperiodic properties of the EEG signal*

313 The present results are indicative of an association between children's chronological age and the aperiodic  
314 properties of the EEG signal. Specifically, exponent values, extracted from the eyes open recordings, were  
315 shown to decline as a function of age; however, this association failed to reach significance in the eyes closed  
316 data after multiple comparison correction. Offset also declined with age, with this result significant for both the  
317 eyes open and eyes closed recordings. These findings largely corroborate previous work also indicating age-  
318 related changes in the aperiodic EEG signal. An initial study by Voytek et al. (2015) that examined EEG recorded  
319 during a visual working memory task found that the slope of the  $1/f$  signal was less negative (i.e., 'flatter'  
320 aperiodic exponent) in older (60-70 years), compared to younger (20-30 years) participants. Similar results were  
321 also reported by Tran et al. (2020) comparing participants across the same age groups as Voytek et al. (2015),  
322 but instead using pretrial baseline EEG recorded during a cognitive task. Consistent with Voytek et al. (2015)  
323 these authors also found that exponent was flatter in the older, compared to younger, group. These key findings  
324 of smaller exponent and reduced offset in older individuals were further recently supported by Merkin et al.  
325 (2021) using eyes closed resting-state EEG in younger (18-35 years) and older (50-86 years) adults. Our  
326 present findings add to this emerging body of evidence in adult populations by demonstrating reduced exponent  
327 and offset with age in a large cohort spanning early-to-middle childhood (4-to-12 years). These findings were  
328 present both when using the signal averaged across the entire scalp, and when using electrode clusters  
329 covering anterior, central, and posterior regions separately (Figure 2B and 2C), thus suggesting that systematic  
330 variations with age are a relatively widespread phenomenon. Importantly, our findings also replicate recent  
331 observations of flattening of the aperiodic exponent with age in infancy (Schaworonkow & Voytek, 2021), as  
332 well as in cohorts with ages ranging from childhood into adulthood (Cellier et al., 2021; Donoghue et al., 2020a;  
333 He et al., 2019; Tröndle et al., 2020). The present results, in conjunction with previous findings, are therefore  
334 supportive of quantitative neurodevelopmental changes in the aperiodic component of the EEG signal.

335  
336 Although precise neurobiological substrate of aperiodic activity remains uncertain, evidence suggests that a  
337 flatter exponent reflects increased asynchronous background neuronal firing (i.e., neural 'noise') which is  
338 theorised to be driven by an increased E/I ratio (Voytek & Knight, 2015; Voytek et al., 2015). This has recently  
339 been supported via both *in silico* models (Gao et al., 2017), as well as neural recordings demonstrating  
340 modulation of the spectral exponent through administration of pharmacological agents known to either increase  
341 inhibition (e.g., propofol), or increase excitation (ketamine) (Gao et al., 2017; Lendner et al., 2020; Waschke et  
342 al., 2021). Hence, it is possible that the age-dependent exponent reductions observed here reflect, to some  
343 extent, maturational changes in E/I balance occurring throughout this neurodevelopmental period, possibly  
344 representing a shift towards increased excitatory tone within neural circuits as children mature. However, further  
345 work is needed to elucidate the precise cellular and molecular mechanisms that underlie these  
346 neurodevelopmental shifts in aperiodic activity. Future studies could combine analysis of the EEG-derived  
347 aperiodic signal with neuroimaging techniques capable of quantifying excitatory and inhibitory neurotransmitter  
348 concentrations (i.e.,  $\gamma$ -aminobutyric acid [GABA] and glutamate) within the brain, such as magnetic resonance  
349 spectroscopy (MRS) (Harris et al., 2017; Thakkar et al., 2017). For instance, there is some limited evidence that  
350 GABA levels increase during neurodevelopment (Porges et al., 2021), however, exactly how this finding ties in  
351 with markers of neural excitability remains to be established. Multi-modal approaches combining

352 neurostimulation with electrophysiology, such as combined transcranial magnetic stimulation and EEG (TMS-  
353 EEG), could also be utilised to probe associations between cortical excitability (via TMS-evoked potentials) and  
354 aperiodic activity across specific cortical targets (Hill et al., 2016; Tremblay et al., 2019).

355

356 The observation of age-related reductions in offset also warrants further investigation. Intracranial local field  
357 potential recordings from patients undergoing neurosurgery provide compelling evidence that broadband power  
358 shifts are positively correlated to neuronal population spiking (Manning et al., 2009), with similar findings also  
359 observed in macaques (Ray & Maunsell, 2011). Hence, our present observation of a reduction in aperiodic  
360 offset with increasing age could be tentatively interpreted to reflect a maturational decline in the spiking rate of  
361 cortical neurons. In keeping with the observed changes in aperiodic exponent, this effect appears to be a  
362 relatively global phenomenon, given that results were taken from the average of the aperiodic signal across all  
363 scalp electrodes. More broadly, these findings also appear consistent with previous observations of reduced  
364 broadband power throughout childhood and into adulthood (Gomez et al., 2017; Segalowitz et al., 2010). It is  
365 possible that reductions in cortical grey matter volume that occur during childhood, likely the result of  
366 maturational 'synaptic pruning'-like processes (Paolicelli et al., 2011; Paus et al., 2008; Pfefferbaum et al.,  
367 1994), are responsible for these findings. However, we note that cautious interpretation is warranted, as  
368 changes in skull conductivity with age might also contribute to these observations when using EEG recordings  
369 (Gomez et al., 2017; Hoekema et al., 2003). In any event, the results of He et al. (2019), which also reported  
370 an age-related decline in offset, lend support to such changes being genuine neural phenomena, given that  
371 these authors used MEG recordings, which are largely unaffected by the electrical resistivity of the skull (Wolters  
372 et al., 2006).

373

#### 374 *4.2 Age predicts alpha centre frequency, but not power*

375 Participants' age was able to predict the aperiodic-adjusted alpha frequency, with older children showing  
376 increased alpha peak frequency. This finding aligns with previously documented observations of alpha  
377 frequency with age both across childhood (Dickinson et al., 2018; Eeg-Olofsson et al., 1971; Marshall et al.,  
378 2002; Miskovic et al., 2015; Somsen et al., 1997), and into adolescence and early adulthood (Chiang et al.,  
379 2011; Cragg et al., 2011). The posterior alpha rhythm first manifests on the EEG record at around 3 months of  
380 age, with a peak frequency between 3-5 Hz, which increases to 6-7 Hz by one year of age (Saby & Marshall,  
381 2012), and continues to increase throughout childhood until reaching a peak between 8-12 Hz in early  
382 adulthood, after which it steadily declines with age (Chiang et al., 2011; Hashemi et al., 2016). It has been  
383 theorised that the increase in alpha frequency seen throughout childhood might represent an increase in the  
384 speed at which interconnected neural populations are able to communicate, as a result of greater myelination  
385 and axon diameter (Segalowitz et al., 2010; Thorpe et al., 2016). A relationship between increasing alpha  
386 frequency and the development of large-scale oscillatory networks would also be in alignment with studies that  
387 have shown associations between peak alpha frequency and cognitive function in children (Carter Leno et al.,  
388 2021; Dickinson et al., 2018). Our present findings also corroborate recent reports of age-related changes in  
389 aperiodic-adjusted alpha centre frequency. Specifically, Cellier et al. (2021) showed that peak frequency within  
390 the 4-12 Hz range increased with age in a cohort which included both children and adults (3-24 years of age);  
391 while He et al. (2019) reported a positive association between age and alpha centre frequency in a small sample

392 (N = 24) of children using MEG recordings. The same trend was also reported by Carter-Leno et al. (2021) in a  
393 longitudinal sample of young children from 1 to 3 years of age. Our findings extend these observations by  
394 demonstrating age-related shifts in alpha centre frequency using both eyes open and eyes closed data from a  
395 large (N = 139) cohort of children spanning early-to-middle childhood. Our results were also specific to the alpha  
396 band, with no evidence of an association between age and beta centre frequency. The maturational changes  
397 observed in alpha frequency, however, did not extend to spectral power in either the alpha or beta frequencies.  
398 Although a number of studies have shown associations between power in various canonical frequencies and  
399 age, considerable heterogeneity exists, with results likely to be strongly contingent on the specific age range  
400 investigated (for review see: Segalowitz et al., 2010). Importantly, the majority of past research examining  
401 narrow-band oscillatory power has failed to account for the potential influence of the aperiodic signal, which  
402 risks conflating these two separate phenomena (Donoghue et al., 2020a; Donoghue et al., 2021). Recent work  
403 examining peak alpha frequency in adulthood also found no age-related changes after accounting for the  
404 aperiodic signal (Merkin et al., 2021).

405

#### 406 *4.3 Limitations and future directions*

407 The present study has some limitations. First, as we used resting-state EEG, the present results are limited to  
408 spontaneous neural activity. Whilst this is valuable for understanding intrinsic (i.e., stimulus free) dynamics,  
409 future work could further extend these findings using task-related paradigms. This might be particularly useful  
410 to help identify relationships between periodic and aperiodic neural dynamics and specific neurocognitive  
411 processes. For example, recent work has identified aperiodic activity as a predictor of working memory  
412 performance (Donoghue et al., 2020b) and cognitive processing speed (Ouyang et al., 2020). Second, we  
413 parameterised our data between 1-40 Hz. We chose this range to reduce the presence of non-neural artefacts  
414 (e.g., electromyographic activity, or microsaccades) which often occur at higher frequencies (Goncharova et al.,  
415 2003; Muthukumaraswamy, 2013; Yuval-Greenberg et al., 2008). While this still represents a broad frequency  
416 range, and is consistent with other EEG studies utilising spectral parameterisation (Carter Leno et al., 2021;  
417 Cellier et al., 2021; Merkin et al., 2021; Robertson et al., 2019), future work could extend these analyses to even  
418 wider frequency ranges to capture higher frequency activity (e.g., > 40 Hz). This might be particularly useful for  
419 more directly comparing MEG and EEG derived data with results from local field potential and  
420 electrocorticography recordings (e.g., Gao et al., 2017; Halgren et al., 2021). Finally, emerging evidence  
421 indicating that the aperiodic exponent might act as a non-invasive measure of E/I balance (Gao et al., 2017;  
422 Waschke et al., 2021) opens exciting possibilities for research into the neurobiology of developmental and  
423 neuropsychiatric disorders linked to dysfunction within excitatory and inhibitory circuits, such as autism and  
424 schizophrenia (Foss-Feig et al., 2017).

425

#### 426 *4.4 Conclusion*

427 The present results highlight several key maturational effects on the spontaneous EEG in recorded in a large  
428 sample of participants spanning early-to-middle childhood (4-to-12 years). Across this age-range, both aperiodic  
429 exponent and offset were shown to decrease with age. Further, aperiodic-adjusted peak alpha frequency  
430 increased with age, while no effect of age was observed for the beta band. Finally, age was not shown to predict  
431 either aperiodic-adjusted alpha, or beta power. These results provide support for nuanced approaches aiming

432 to examine neural dynamics within neurodevelopmental cohorts, which disentangle narrow-band oscillatory  
433 features from broadband aperiodic activity.  
434

435 **REFERENCES**

- 436 Bailey, N. W., Biabani, M., Hill, A. T., Rogasch, N. C., McQueen, B., & Fitzgerald, P. B. (2021). Introducing  
437 RELAX (the Reduction of Electrophysiological Artifacts): A fully automatic pre-processing pipeline for  
438 EEG data. *In Preparation*.
- 439 Barry, R. J., & De Blasio, F. M. (2021). Characterizing pink and white noise in the human  
440 electroencephalogram. *J Neural Eng*. doi:10.1088/1741-2552/abe399
- 441 Başar, E. (2013). Brain oscillations in neuropsychiatric disease. *Dialogues in clinical neuroscience*, 15(3), 291-  
442 300. doi:10.31887/DCNS.2013.15.3/ebasar
- 443 Benchenane, K., Tiesinga, P. H., & Battaglia, F. P. (2011). Oscillations in the prefrontal cortex: a gateway to  
444 memory and attention. *Curr Opin Neurobiol*, 21(3), 475-485. doi:10.1016/j.conb.2011.01.004
- 445 Benninger, C., Matthis, P., & Scheffner, D. (1984). EEG development of healthy boys and girls. Results of a  
446 longitudinal study. *Electroencephalography and Clinical Neurophysiology*, 57(1), 1-12.  
447 doi:[https://doi.org/10.1016/0013-4694\(84\)90002-6](https://doi.org/10.1016/0013-4694(84)90002-6)
- 448 Bigdely-Shamlo, N., Mullen, T., Kothe, C., Su, K. M., & Robbins, K. A. (2015). The PREP pipeline:  
449 standardized preprocessing for large-scale EEG analysis. *Front Neuroinform*, 9, 16.  
450 doi:10.3389/fninf.2015.00016
- 451 Bullock, T. H., McClune, M. C., & Enright, J. T. (2003). Are the electroencephalograms mainly rhythmic?  
452 Assessment of periodicity in wide-band time series. *Neuroscience*, 121(1), 233-252.  
453 doi:[https://doi.org/10.1016/S0306-4522\(03\)00208-2](https://doi.org/10.1016/S0306-4522(03)00208-2)
- 454 Bunge, S. A., & Wright, S. B. (2007). Neurodevelopmental changes in working memory and cognitive control.  
455 *Curr Opin Neurobiol*, 17(2), 243-250. doi:10.1016/j.conb.2007.02.005
- 456 Buzsáki, G., Anastassiou, C. A., & Koch, C. (2012). The origin of extracellular fields and currents — EEG,  
457 ECoG, LFP and spikes. *Nature Reviews Neuroscience*, 13(6), 407-420.  
458 doi:[http://www.nature.com/nrn/journal/v13/n6/supinfo/nrn3241\\_S1.html](http://www.nature.com/nrn/journal/v13/n6/supinfo/nrn3241_S1.html)
- 459 Buzsaki, G., & Draguhn, A. (2004). Neuronal oscillations in cortical networks. *Science*, 304(5679), 1926-1929.  
460 doi:10.1126/science.1099745
- 461 Carter Leno, V., Pickles, A., van Noordt, S., Huberty, S., Desjardins, J., Webb, S. J., . . . Team, B. (2021). 12-  
462 Month peak alpha frequency is a correlate but not a longitudinal predictor of non-verbal cognitive  
463 abilities in infants at low and high risk for autism spectrum disorder. *Dev Cogn Neurosci*, 48, 100938.  
464 doi:10.1016/j.dcn.2021.100938
- 465 Casey, B. J., Tottenham, N., Liston, C., & Durston, S. (2005). Imaging the developing brain: what have we  
466 learned about cognitive development? *Trends Cogn Sci*, 9(3), 104-110. doi:10.1016/j.tics.2005.01.011
- 467 Cellier, D., Riddle, J., Petersen, I., & Hwang, K. (2021). The development of theta and alpha neural  
468 oscillations from ages 3 to 24 years. *Dev Cogn Neurosci*. doi:10.1016/j.dcn.2021.100969
- 469 Chiang, A. K., Rennie, C. J., Robinson, P. A., van Albada, S. J., & Kerr, C. C. (2011). Age trends and sex  
470 differences of alpha rhythms including split alpha peaks. *Clin Neurophysiol*, 122(8), 1505-1517.  
471 doi:10.1016/j.clinph.2011.01.040
- 472 Clarke, A. R., Barry, R. J., McCarthy, R., & Selikowitz, M. (2001). Age and sex effects in the EEG:  
473 development of the normal child. *Clinical Neurophysiology*, 112(5), 806-814.  
474 doi:[https://doi.org/10.1016/S1388-2457\(01\)00488-6](https://doi.org/10.1016/S1388-2457(01)00488-6)



- 475 Cohen, M. X. (2017). Where Does EEG Come From and What Does It Mean? *Trends Neurosci*, 40(4), 208-  
476 218. doi:10.1016/j.tins.2017.02.004
- 477 Colombo, M. A., Napolitani, M., Boly, M., Gosseries, O., Casarotto, S., Rosanova, M., . . . Sarasso, S. (2019).  
478 The spectral exponent of the resting EEG indexes the presence of consciousness during  
479 unresponsiveness induced by propofol, xenon, and ketamine. *Neuroimage*, 189, 631-644.  
480 doi:10.1016/j.neuroimage.2019.01.024
- 481 Cragg, L., Kovacevic, N., McIntosh, A. R., Poulsen, C., Martinu, K., Leonard, G., & Paus, T. (2011).  
482 Maturation of EEG power spectra in early adolescence: a longitudinal study. *Developmental Science*,  
483 14(5), 935-943. doi:<https://doi.org/10.1111/j.1467-7687.2010.01031.x>
- 484 Dave, S., Brothers, T. A., & Swaab, T. Y. (2018). 1/f neural noise and electrophysiological indices of  
485 contextual prediction in aging. *Brain Res*, 1691, 34-43. doi:10.1016/j.brainres.2018.04.007
- 486 De Bellis, M. D., Keshavan, M. S., Beers, S. R., Hall, J., Frustaci, K., Masalehdan, A., . . . Boring, A. M.  
487 (2001). Sex Differences in Brain Maturation during Childhood and Adolescence. *Cerebral Cortex*,  
488 11(6), 552-557. doi:10.1093/cercor/11.6.552
- 489 Delorme, A., & Makeig, S. (2004). EEGLAB: an open source toolbox for analysis of single-trial EEG dynamics  
490 including independent component analysis. *J Neurosci Methods*, 134(1), 9-21.  
491 doi:10.1016/j.jneumeth.2003.10.009
- 492 Dickinson, A., DiStefano, C., Senturk, D., & Jeste, S. S. (2018). Peak alpha frequency is a neural marker of  
493 cognitive function across the autism spectrum. *Eur J Neurosci*, 47(6), 643-651. doi:10.1111/ejn.13645
- 494 Donoghue, T., Dominguez, J., & Voytek, B. (2020a). Electrophysiological Frequency Band Ratio Measures  
495 Conflate Periodic and Aperiodic Neural Activity. *eNeuro*, 7(6). doi:10.1523/ENEURO.0192-20.2020
- 496 Donoghue, T., Haller, M., Peterson, E. J., Varma, P., Sebastian, P., Gao, R., . . . Voytek, B. (2020b).  
497 Parameterizing neural power spectra into periodic and aperiodic components. *Nat Neurosci*, 23(12),  
498 1655-1665. doi:10.1038/s41593-020-00744-x
- 499 Donoghue, T., Schaworonkow, N., & Voytek, B. (2021). Methodological considerations for studying neural  
500 oscillations. *Eur J Neurosci*. doi:10.1111/ejn.15361
- 501 Eeg-Olofsson, O., Petersén, I., & Selldén, U. (1971). The development of the electroencephalogram in normal  
502 children from the age of 1 through 15 years. Paroxysmal activity. *Neuropadiatrie*, 2(4), 375-404.  
503 doi:10.1055/s-0028-1091791
- 504 Feinberg, I., & Campbell, I. G. (2010). Sleep EEG changes during adolescence: an index of a fundamental  
505 brain reorganization. *Brain Cogn*, 72(1), 56-65. doi:10.1016/j.bandc.2009.09.008
- 506 Foss-Feig, J. H., Adkinson, B. D., Ji, J. L., Yang, G., Srihari, V. H., McPartland, J. C., . . . Anticevic, A. (2017).  
507 Searching for Cross-Diagnostic Convergence: Neural Mechanisms Governing Excitation and  
508 Inhibition Balance in Schizophrenia and Autism Spectrum Disorders. *Biol Psychiatry*, 81(10), 848-861.  
509 doi:10.1016/j.biopsych.2017.03.005
- 510 Gao, R., Peterson, E. J., & Voytek, B. (2017). Inferring synaptic excitation/inhibition balance from field  
511 potentials. *Neuroimage*, 158, 70-78. doi:10.1016/j.neuroimage.2017.06.078
- 512 Gasser, T., Verleger, R., Bächer, P., & Sroka, L. (1988). Development of the EEG of school-age children and  
513 adolescents. I. Analysis of band power. *Electroencephalography and Clinical Neurophysiology*, 69(2),  
514 91-99. doi:[https://doi.org/10.1016/0013-4694\(88\)90204-0](https://doi.org/10.1016/0013-4694(88)90204-0)

- 515 Gómez, C., M Pérez-Macías, J., Poza, J., Fernández, A., & Hornero, R. (2013). Spectral changes in  
516 spontaneous MEG activity across the lifespan. *J Neural Eng*, *10*(6), 066006. doi:10.1088/1741-  
517 2560/10/6/066006
- 518 Gomez, C. M., Rodriguez-Martinez, E. I., Fernandez, A., Maestu, F., Poza, J., & Gomez, C. (2017). Absolute  
519 Power Spectral Density Changes in the Magnetoencephalographic Activity During the Transition from  
520 Childhood to Adulthood. *Brain Topogr*, *30*(1), 87-97. doi:10.1007/s10548-016-0532-0
- 521 Goncharova, I. I., McFarland, D. J., Vaughan, T. M., & Wolpaw, J. R. (2003). EMG contamination of EEG:  
522 spectral and topographical characteristics. *Clinical Neurophysiology*, *114*(9), 1580-1593.  
523 doi:[https://doi.org/10.1016/S1388-2457\(03\)00093-2](https://doi.org/10.1016/S1388-2457(03)00093-2)
- 524 Halgren, M., Kang, R., Voytek, B., Ulbert, I., Fabo, D., Eross, L. G., . . . Cash, S. S. (2021). The timescale and  
525 magnitude of aperiodic activity decreases with cortical depth in humans, macaques and mice.  
526 *bioRxiv*, 2021.2007.2028.454235. doi:10.1101/2021.07.28.454235
- 527 Harris, A. D., Saleh, M. G., & Edden, R. A. (2017). Edited (1) H magnetic resonance spectroscopy in vivo:  
528 Methods and metabolites. *Magn Reson Med*, *77*(4), 1377-1389. doi:10.1002/mrm.26619
- 529 Hashemi, A., Pino, L. J., Moffat, G., Mathewson, K. J., Aimone, C., Bennett, P. J., . . . Sekuler, A. B. (2016).  
530 Characterizing Population EEG Dynamics throughout Adulthood. *eNeuro*, *3*(6).  
531 doi:10.1523/ENEURO.0275-16.2016
- 532 He, B. J. (2014). Scale-free brain activity: past, present, and future. *Trends Cogn Sci*, *18*(9), 480-487.  
533 doi:10.1016/j.tics.2014.04.003
- 534 He, B. J., Zempel, J. M., Snyder, A. Z., & Raichle, M. E. (2010). The temporal structures and functional  
535 significance of scale-free brain activity. *Neuron*, *66*(3), 353-369. doi:10.1016/j.neuron.2010.04.020
- 536 He, W., Donoghue, T., Sowman, P. F., Seymour, R. A., Brock, J., Crain, S., . . . Hillebrand, A. (2019). Co-  
537 Increasing Neuronal Noise and Beta Power in the Developing Brain. doi:10.1101/839258
- 538 Hill, A. T., Rogasch, N. C., Fitzgerald, P. B., & Hoy, K. E. (2016). TMS-EEG: A window into the  
539 neurophysiological effects of transcranial electrical stimulation in non-motor brain regions. *Neurosci*  
540 *Biobehav Rev*, *64*, 175-184. doi:10.1016/j.neubiorev.2016.03.006
- 541 Hoekema, R., Wieneke, G. H., Leijten, F. S. S., van Veelen, C. W. M., van Rijen, P. C., Huiskamp, G. J. M., . .  
542 . van Huffelen, A. C. (2003). Measurement of the Conductivity of Skull, Temporarily Removed During  
543 Epilepsy Surgery. *Brain Topogr*, *16*(1), 29-38. doi:10.1023/A:1025606415858
- 544 Jacob, M. S., Roach, B. J., Sargent, K., Mathalon, D. H., & Ford, J. M. (2021). Aperiodic measures of neural  
545 excitability are associated with anticorrelated hemodynamic networks at rest: a combined EEG-fMRI  
546 study. doi:10.1101/2021.01.30.427861
- 547 John, E., Ahn, H., Prichep, L., Trepetin, M., Brown, D., & Kaye, H. (1980). Developmental equations for the  
548 electroencephalogram. *Science*, *210*(4475), 1255-1258. doi:10.1126/science.7434026
- 549 Kahana, M. J. (2006). The cognitive correlates of human brain oscillations. *J Neurosci*, *26*(6), 1669-1672.  
550 doi:10.1523/JNEUROSCI.3737-05c.2006
- 551 Lendner, J. D., Helfrich, R. F., Mander, B. A., Romundstad, L., Lin, J. J., Walker, M. P., . . . Knight, R. T.  
552 (2020). An electrophysiological marker of arousal level in humans. *Elife*, *9*. doi:10.7554/eLife.55092
- 553 Lujan, R., Shigemoto, R., & Lopez-Bendito, G. (2005). Glutamate and GABA receptor signalling in the  
554 developing brain. *Neuroscience*, *130*(3), 567-580. doi:10.1016/j.neuroscience.2004.09.042

- 555 Manning, J. R., Jacobs, J., Fried, I., & Kahana, M. J. (2009). Broadband shifts in local field potential power  
556 spectra are correlated with single-neuron spiking in humans. *J Neurosci*, 29(43), 13613-13620.  
557 doi:10.1523/JNEUROSCI.2041-09.2009
- 558 Marshall, P. J., Bar-Haim, Y., & Fox, N. A. (2002). Development of the EEG from 5 months to 4 years of age.  
559 *Clinical Neurophysiology*, 113(8), 1199-1208. doi:[https://doi.org/10.1016/S1388-2457\(02\)00163-3](https://doi.org/10.1016/S1388-2457(02)00163-3)
- 560 Merkin, A., Sghirripa, S., Graetz, L., Smith, A. E., Hordacre, B., Harris, R., . . . Goldsworthy, M. (2021). Age  
561 differences in aperiodic neural activity measured with resting EEG. *bioRxiv*, 2021.2008.2031.458328.  
562 doi:10.1101/2021.08.31.458328
- 563 Michel, C. M., & Murray, M. M. (2012). Towards the utilization of EEG as a brain imaging tool. *Neuroimage*,  
564 61(2), 371-385. doi:10.1016/j.neuroimage.2011.12.039
- 565 Miskovic, V., Ma, X., Chou, C. A., Fan, M., Owens, M., Sayama, H., & Gibb, B. E. (2015). Developmental  
566 changes in spontaneous electrocortical activity and network organization from early to late childhood.  
567 *Neuroimage*, 118, 237-247. doi:10.1016/j.neuroimage.2015.06.013
- 568 Molina, J. L., Voytek, B., Thomas, M. L., Joshi, Y. B., Bhakta, S. G., Talledo, J. A., . . . Light, G. A. (2020).  
569 Memantine Effects on Electroencephalographic Measures of Putative Excitatory/Inhibitory Balance in  
570 Schizophrenia. *Biological Psychiatry: Cognitive Neuroscience and Neuroimaging*, 5(6), 562-568.  
571 doi:10.1016/j.bpsc.2020.02.004
- 572 Muthukumaraswamy, S. D. (2013). High-frequency brain activity and muscle artifacts in MEG/EEG: a review  
573 and recommendations. *Front Hum Neurosci*, 7, 138. doi:10.3389/fnhum.2013.00138
- 574 Muthukumaraswamy, S. D., & Liley, D. T. (2018). 1/f electrophysiological spectra in resting and drug-induced  
575 states can be explained by the dynamics of multiple oscillatory relaxation processes. *Neuroimage*,  
576 179, 582-595. doi:10.1016/j.neuroimage.2018.06.068
- 577 Newson, J. J., & Thiagarajan, T. C. (2018). EEG Frequency Bands in Psychiatric Disorders: A Review of  
578 Resting State Studies. *Front Hum Neurosci*, 12, 521. doi:10.3389/fnhum.2018.00521
- 579 Ostlund, B. D., Alperin, B. R., Drew, T., & Karalunas, S. L. (2021a). Behavioral and cognitive correlates of the  
580 aperiodic (1/f-like) exponent of the EEG power spectrum in adolescents with and without ADHD. *Dev*  
581 *Cogn Neurosci*, 48, 100931. doi:10.1016/j.dcn.2021.100931
- 582 Ostlund, B. D., Donoghue, T., Anaya, B., Gunther, K. E., Karalunas, S. L., Voytek, B., & Perez-Edgar, K. E.  
583 (2021b). Spectral parameterization for studying neurodevelopment: How and why. *PsyArXiv*.  
584 doi:<https://doi.org/10.31234/osf.io/btqyk>
- 585 Ouyang, G., Hildebrandt, A., Schmitz, F., & Herrmann, C. S. (2020). Decomposing alpha and 1/f brain  
586 activities reveals their differential associations with cognitive processing speed. *Neuroimage*, 205,  
587 116304. doi:10.1016/j.neuroimage.2019.116304
- 588 Paolicelli, R. C., Bolasco, G., Pagani, F., Maggi, L., Scianni, M., Panzanelli, P., . . . Gross, C. T. (2011).  
589 Synaptic pruning by microglia is necessary for normal brain development. *Science*, 333(6048), 1456-  
590 1458. doi:10.1126/science.1202529
- 591 Paus, T., Keshavan, M., & Giedd, J. N. (2008). Why do many psychiatric disorders emerge during  
592 adolescence? *Nature Reviews Neuroscience*, 9(12), 947-957. doi:10.1038/nrn2513

- 593 Pfefferbaum, A., Mathalon, D. H., Sullivan, E. V., Rawles, J. M., Zipursky, R. B., & Lim, K. O. (1994). A  
594 Quantitative Magnetic Resonance Imaging Study of Changes in Brain Morphology From Infancy to  
595 Late Adulthood. *Arch Neurol*, 51(9), 874-887. doi:10.1001/archneur.1994.00540210046012
- 596 Pion-Tonachini, L., Kreutz-Delgado, K., & Makeig, S. (2019). ICLabel: An automated electroencephalographic  
597 independent component classifier, dataset, and website. *Neuroimage*, 198, 181-197.  
598 doi:10.1016/j.neuroimage.2019.05.026
- 599 Porges, E. C., Jensen, G., Foster, B., Edden, R. A., & Puts, N. A. (2021). The trajectory of cortical GABA  
600 across the lifespan, an individual participant data meta-analysis of edited MRS studies. *Elife*, 10.  
601 doi:10.7554/eLife.62575
- 602 Pritchard, W. S. (1992). The Brain in Fractal Time: 1/F-Like Power Spectrum Scaling of the Human  
603 Electroencephalogram. *International Journal of Neuroscience*, 66(1-2), 119-129.  
604 doi:10.3109/00207459208999796
- 605 R Core Team. (2020). R: A Language Environment for Statistical Computing. Vienna, Austria: R Foundation  
606 for Statistical Computing.
- 607 Ray, S., & Maunsell, J. H. (2011). Different origins of gamma rhythm and high-gamma activity in macaque  
608 visual cortex. *PLoS Biol*, 9(4), e1000610. doi:10.1371/journal.pbio.1000610
- 609 Robertson, M. M., Furlong, S., Voytek, B., Donoghue, T., Boettiger, C. A., & Sheridan, M. A. (2019). EEG  
610 power spectral slope differs by ADHD status and stimulant medication exposure in early childhood. *J*  
611 *Neurophysiol*, 122(6), 2427-2437. doi:10.1152/jn.00388.2019
- 612 Saby, J. N., & Marshall, P. J. (2012). The Utility of EEG Band Power Analysis in the Study of Infancy and  
613 Early Childhood. *Developmental Neuropsychology*, 37(3), 253-273.  
614 doi:10.1080/87565641.2011.614663
- 615 Schaworonkow, N., & Voytek, B. (2021). Longitudinal changes in aperiodic and periodic activity in  
616 electrophysiological recordings in the first seven months of life. *Dev Cogn Neurosci*, 47, 100895.  
617 doi:10.1016/j.dcn.2020.100895
- 618 Segalowitz, S. J., Santesso, D. L., & Jetha, M. K. (2010). Electrophysiological changes during adolescence: a  
619 review. *Brain Cogn*, 72(1), 86-100. doi:10.1016/j.bandc.2009.10.003
- 620 Somsen, R. J. M., van't Klooster, B. J., van der Molen, M. W., van Leeuwen, H. M. P., & Licht, R. (1997).  
621 Growth spurts in brain maturation during middle childhood as indexed by EEG power spectra. *Biol*  
622 *Psychol*, 44(3), 187-209. doi:[https://doi.org/10.1016/S0301-0511\(96\)05218-0](https://doi.org/10.1016/S0301-0511(96)05218-0)
- 623 Stroganova, T. A., Orekhova, E. V., & Posikera, I. N. (1999). EEG alpha rhythm in infants. *Clinical*  
624 *Neurophysiology*, 110(6), 997-1012. doi:[https://doi.org/10.1016/S1388-2457\(98\)00009-1](https://doi.org/10.1016/S1388-2457(98)00009-1)
- 625 Thakkar, K. N., Rosler, L., Wijnen, J. P., Boer, V. O., Klomp, D. W., Cahn, W., . . . Negggers, S. F. (2017). 7T  
626 Proton Magnetic Resonance Spectroscopy of Gamma-Aminobutyric Acid, Glutamate, and Glutamine  
627 Reveals Altered Concentrations in Patients With Schizophrenia and Healthy Siblings. *Biol Psychiatry*,  
628 81(6), 525-535. doi:10.1016/j.biopsych.2016.04.007
- 629 Thorpe, S. G., Cannon, E. N., & Fox, N. A. (2016). Spectral and source structural development of mu and  
630 alpha rhythms from infancy through adulthood. *Clin Neurophysiol*, 127(1), 254-269.  
631 doi:10.1016/j.clinph.2015.03.004

- 632 Tran, T. T., Rolle, C. E., Gazzaley, A., & Voytek, B. (2020). Linked Sources of Neural Noise Contribute to  
633 Age-related Cognitive Decline. *J Cogn Neurosci*, 32(9), 1813-1822. doi:10.1162/jocn\_a\_01584
- 634 Tremblay, S., Rogasch, N. C., Premoli, I., Blumberger, D. M., Casarotto, S., Chen, R., . . . Daskalakis, Z. J.  
635 (2019). Clinical utility and prospective of TMS–EEG. *Clinical Neurophysiology*, 130(5), 802-844.  
636 doi:<https://doi.org/10.1016/j.clinph.2019.01.001>
- 637 Tröndle, M., Popov, T., & Langer, N. (2020). Decomposing the role of alpha oscillations during brain  
638 maturation. *bioRxiv*, 2020.2011.2006.370882. doi:10.1101/2020.11.06.370882
- 639 Uhlhaas, P. J., Roux, F., Rodriguez, E., Rotarska-Jagiela, A., & Singer, W. (2010). Neural synchrony and the  
640 development of cortical networks. *Trends Cogn Sci*, 14(2), 72-80. doi:10.1016/j.tics.2009.12.002
- 641 Voytek, B., & Knight, R. T. (2015). Dynamic network communication as a unifying neural basis for cognition,  
642 development, aging, and disease. *Biol Psychiatry*, 77(12), 1089-1097.  
643 doi:10.1016/j.biopsych.2015.04.016
- 644 Voytek, B., Kramer, M. A., Case, J., Lepage, K. Q., Tempesta, Z. R., Knight, R. T., & Gazzaley, A. (2015).  
645 Age-Related Changes in 1/f Neural Electrophysiological Noise. *J Neurosci*, 35(38), 13257-13265.  
646 doi:10.1523/JNEUROSCI.2332-14.2015
- 647 Wang, J., Barstein, J., Ethridge, L. E., Mosconi, M. W., Takarae, Y., & Sweeney, J. A. (2013). Resting state  
648 EEG abnormalities in autism spectrum disorders. *Journal of Neurodevelopmental Disorders*, 5(1), 24.  
649 doi:10.1186/1866-1955-5-24
- 650 Waschke, L., Donoghue, T., Fiedler, L., Smith, S., Garrett, D. D., Voytek, B., & Obleser, J. (2021). Modality-  
651 specific tracking of attention and sensory statistics in the human electrophysiological spectral  
652 exponent. *bioRxiv*, 2021.2001.2013.426522. doi:10.1101/2021.01.13.426522
- 653 Wilkinson, C. L., & Nelson, C. A. (2021). Increased aperiodic gamma power in young boys with Fragile X  
654 Syndrome is associated with better language ability. *Molecular Autism*, 12(1), 17.  
655 doi:10.1186/s13229-021-00425-x
- 656 Wolters, C. H., Anwander, A., Tricoche, X., Weinstein, D., Koch, M. A., & MacLeod, R. S. (2006). Influence of  
657 tissue conductivity anisotropy on EEG/MEG field and return current computation in a realistic head  
658 model: a simulation and visualization study using high-resolution finite element modeling.  
659 *Neuroimage*, 30(3), 813-826. doi:10.1016/j.neuroimage.2005.10.014
- 660 Yeo, I. K., & Johnson, R. A. (2000). A new family of power transformations to improve normality or symmetry.  
661 *Biometrika*, 87(4), 954-959. doi:10.1093/biomet/87.4.954
- 662 Yuval-Greenberg, S., Tomer, O., Keren, A. S., Nelken, I., & Deouell, L. Y. (2008). Transient induced gamma-  
663 band response in EEG as a manifestation of miniature saccades. *Neuron*, 58(3), 429-441.  
664 doi:10.1016/j.neuron.2008.03.027
- 665
